# Supplementary material for: Junctional Adhesion Molecule-C Mediates the Recruitment of Embryonic-Endothelial Progenitor Cells to the Perivascular Niche during Tumor Angiogenesis
Source: MDPI journal article supplement (doi:10.3390/ijms21041209), 2020-02-11
Supplement: s1 [file s1]

Supplementary material

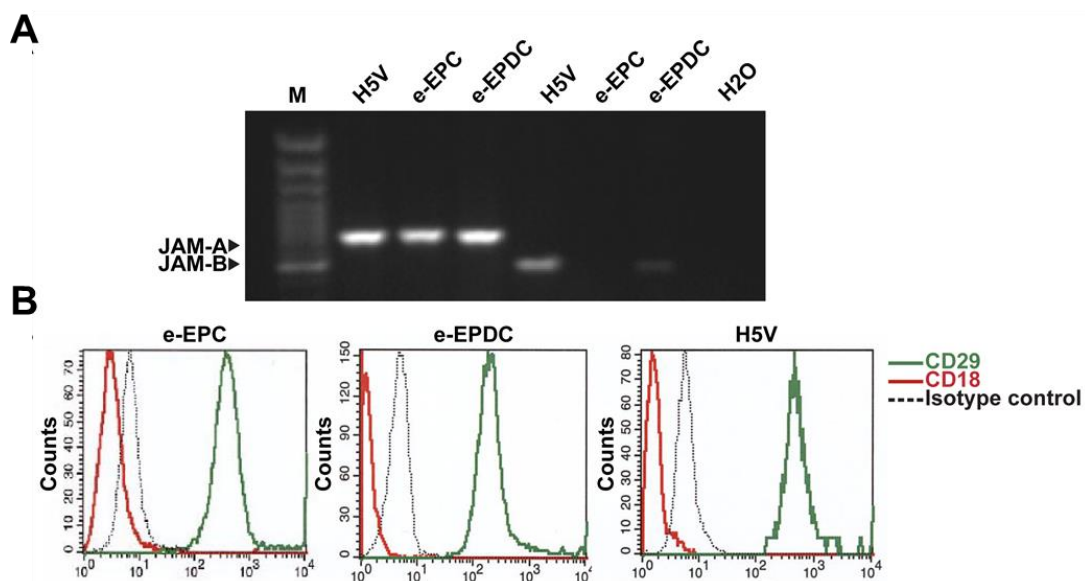

**Supplementary Figure 1.** e-EPC expression analysis of other JAM-family members and of reported counter receptors of JAM-C. **(A)** RT-PCR expression analysis of JAM-A and JAM-B in e-EPC, e-EPDC and in H5V cell line (used as control). **(B)** FACS analysis of CD18 ( $\beta 2$  integrin) and CD29 ( $\beta 1$  integrin) on e-EPC, e-EPDC and H5V endothelial cells.

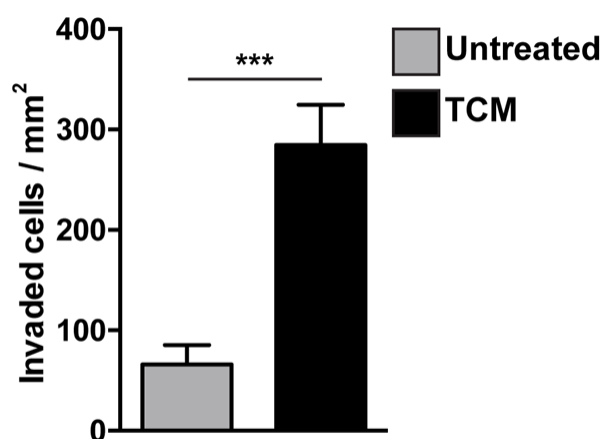

**Supplementary Figure 2.** e-EPC matrigel invasion assay *in vitro*. Matrigel invasion assay into transwell system of e-EPC in response control medium (MAM) or to tumor conditioned medium (TCM). Data are mean  $\pm$  SD (n=3); \*\*\*  $p < 0.001$ .

**A**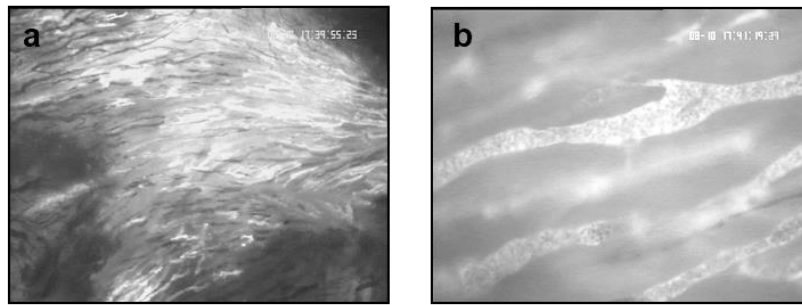**B**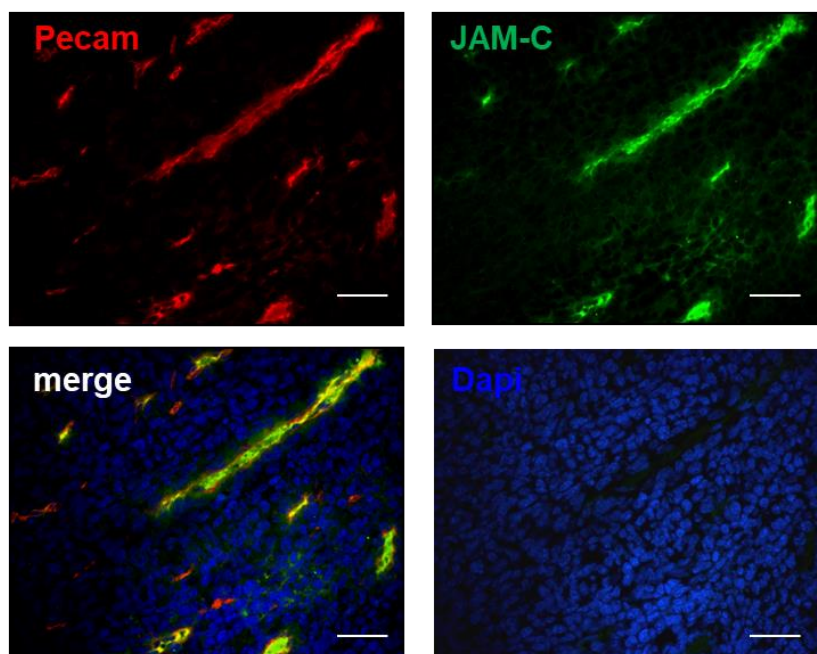

**Supplementary Figure 3.** Lewis Lung Carcinoma (LLC) tumor in the dorsal skin fold chamber and immunofluorescence analysis of JAM-C on tumor microvessels. **(A)** Representative images of LLC microvasculature on day 17 after tumor cell implantation into female C57BL/6 mice. Note the characteristic parallel pattern of the LLC micro-vessels (a, magnification 5x; b and c magnification 20x). Visualization by intravital epi-fluorescent video-microscopy. Contrast enhancement by fluorescein isothiocyanate (FITC)-Dextran 150,000 i.v. **(B)** Frozen sections of LLC tumor implanted in the dorsal skin fold chamber (n=3; 17 days after implantation) were stained for PECAM-1 (red) used as internal control and JAM-C (green). DAPI was used for nuclei staining. Images were merged to confirm the co-localization of JAM-C with PECAM-1 in the tumor microvessels. Images were acquired using a fluorescent microscope (Axioplan 2 imaging, Zeiss, Jena, Germany). Scale bar 20 $\mu$ m.
